# Supplementary material for: Calculation of Overall Hospital Quality Star Ratings With and Without Inclusion of the Peer Grouping Step
Source: PubMed Central journal article supplement (PMC11099678; doi:10.1001/jamanetworkopen.2024.11933), 2024-05-16
Supplement: jamanetwopen-e2411933-s002.pdf [file jamanetwopen-e2411933-s002.pdf]

## Data Sharing Statement

Gettel. Calculation of Overall Hospital Quality Star Ratings With and Without Inclusion of the Peer Grouping Step. *JAMA Netw Open*. Published May 16, 2024.

doi:10.1001/jamanetworkopen.2024.11933

### Data

**Data available:** Yes

**Data types:** Data (not involving human participants), Data dictionary

**How to access data:** Email - [cmsstarratings@yale.edu](mailto:cmsstarratings@yale.edu)

**When available:** With publication

### Supporting Documents

**Document types:** None

### Additional Information

**Who can access the data:** Researchers whose proposed use of the data has been reviewed and approved by the Star Ratings team.

**Types of analyses:** For specific purposes upon approval by the Star Ratings team.

**Mechanisms of data availability:** After approval of proposal.
